# Supplementary material for: Mussel Inspired Polynorepinephrine Functionalized Electrospun Polycaprolactone Microfibers for Muscle Regeneration
Source: PubMed Central journal article supplement (PMC5557809; doi:10.1038/s41598-017-08572-z), 2017-08-15
Supplement: 41598_2017_8572_MOESM1_ESM.pdf [file 41598_2017_8572_MOESM1_ESM.pdf]

## Supporting Information

### **Mussel Inspired Polynorepinephrine Functionalized Electrospun Polycaprolactone Microfibers for Muscle Regeneration**

*Ying Liu<sup>#</sup>, Guoqiang Zhou<sup>#</sup>, Zhu Liu, Mengyu Guo, Xiumei Jiang, Mehmet Berat Taskin, Zhongyang Zhang, Jing Liu, Jinglong Tang, Ru Bai, Flemming Besenbacher, Menglin Chen\*, Chunying Chen\**

**Ying Liu, Mengyu Guo, Xiumei Jiang, Jing Liu, Jinglong Tang, Ru Bai, Chunying Chen**

CAS Key Laboratory for Biomedical Effects of Nanomaterials and Nanosafety and CAS Center for Excellence in Nanoscience, National Center for Nanoscience and Technology (NCNST), Beijing 100190, China

Chunying Chen, [chenchy@nanoctr.cn](mailto:chenchy@nanoctr.cn), Tel.: +86 10 82545560; fax: +86 10 62656765

**Mehmet Berat Taskin, Zhongyang Zhang, Flemming Besenbacher, Menglin Chen**

Interdisciplinary Nanoscience Center (iNANO), Aarhus University, DK-8000 Aarhus C, Denmark

Menglin Chen, [menglin@inano.au.dk](mailto:menglin@inano.au.dk)

**Guoqiang Zhou, Zhu Liu**

Key Laboratory of Medicinal Chemistry and Molecular Diagnosis of Ministry of Education, College of Chemistry and Environmental Science, Hebei University, Baoding, China

Ying Liu and Guoqiang Zhou contributed equally to this work.

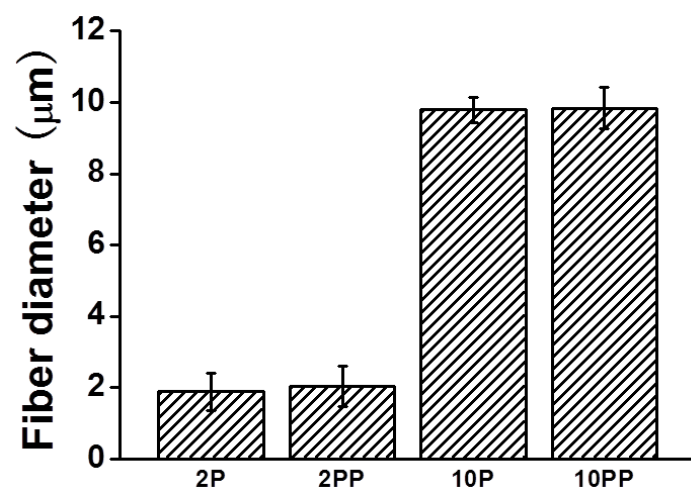

**Figure S1.** The diameter of PCL fibrous membranes.

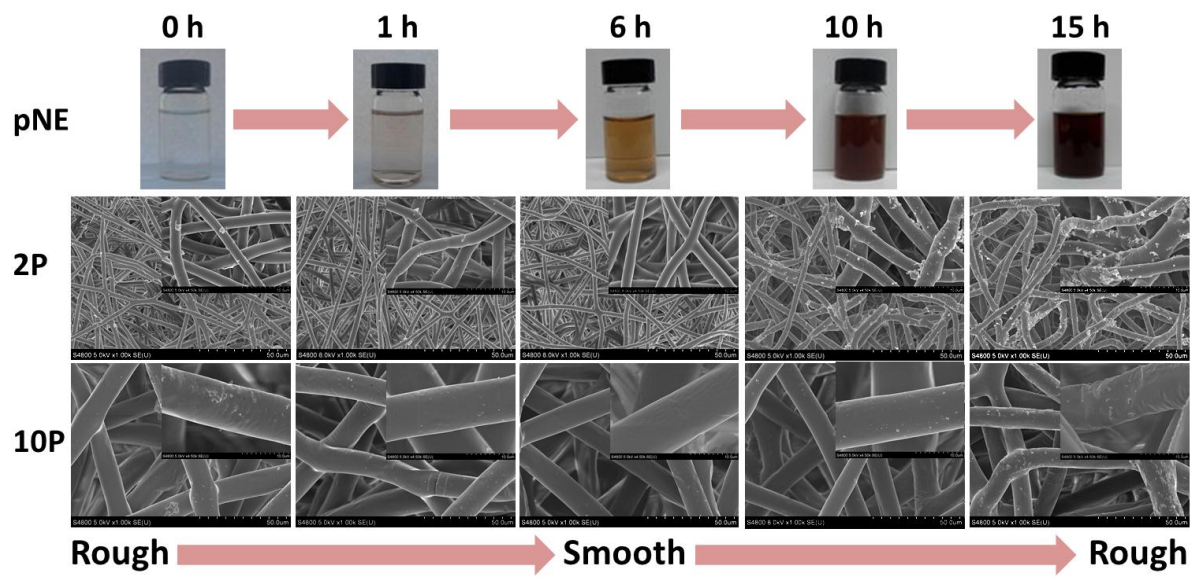

**Figure S2.** The process of polynorepinephrine (pNE) coating PCL fibrous membranes.

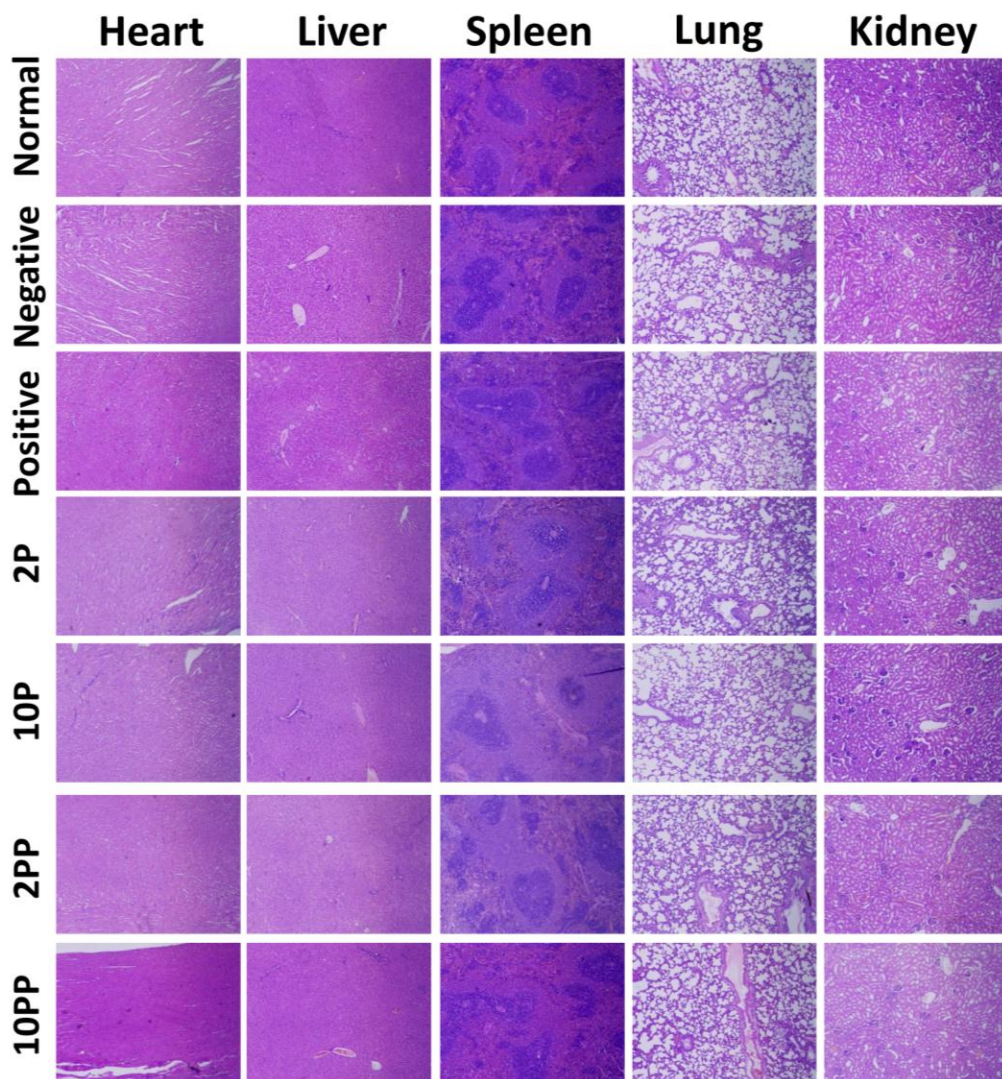

**Figure S3.** Histological observations of liver, spleen, lung and kidneys.

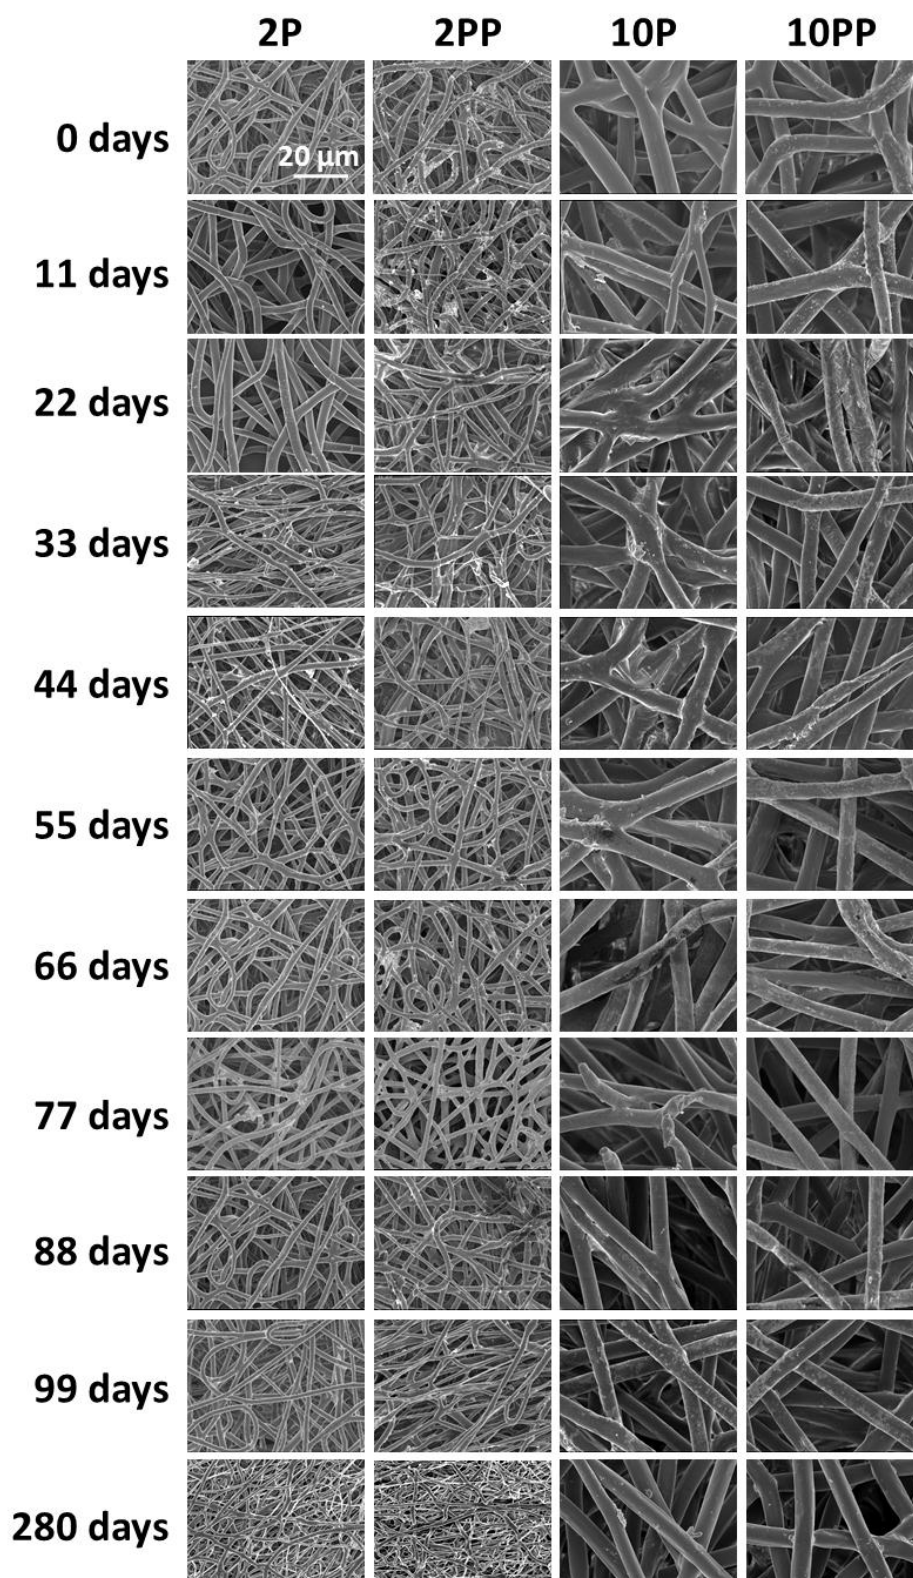

**Figure S4.** The degradation profile of PCL fibrous membranes *in vitro*. SEM images of PCL fibrous membranes after cultured in PBS at 37 °C for 11, 22, 33, 44, 55, 66, 77, 88, 99 and 280 days, respectively.

**Figure 5.**

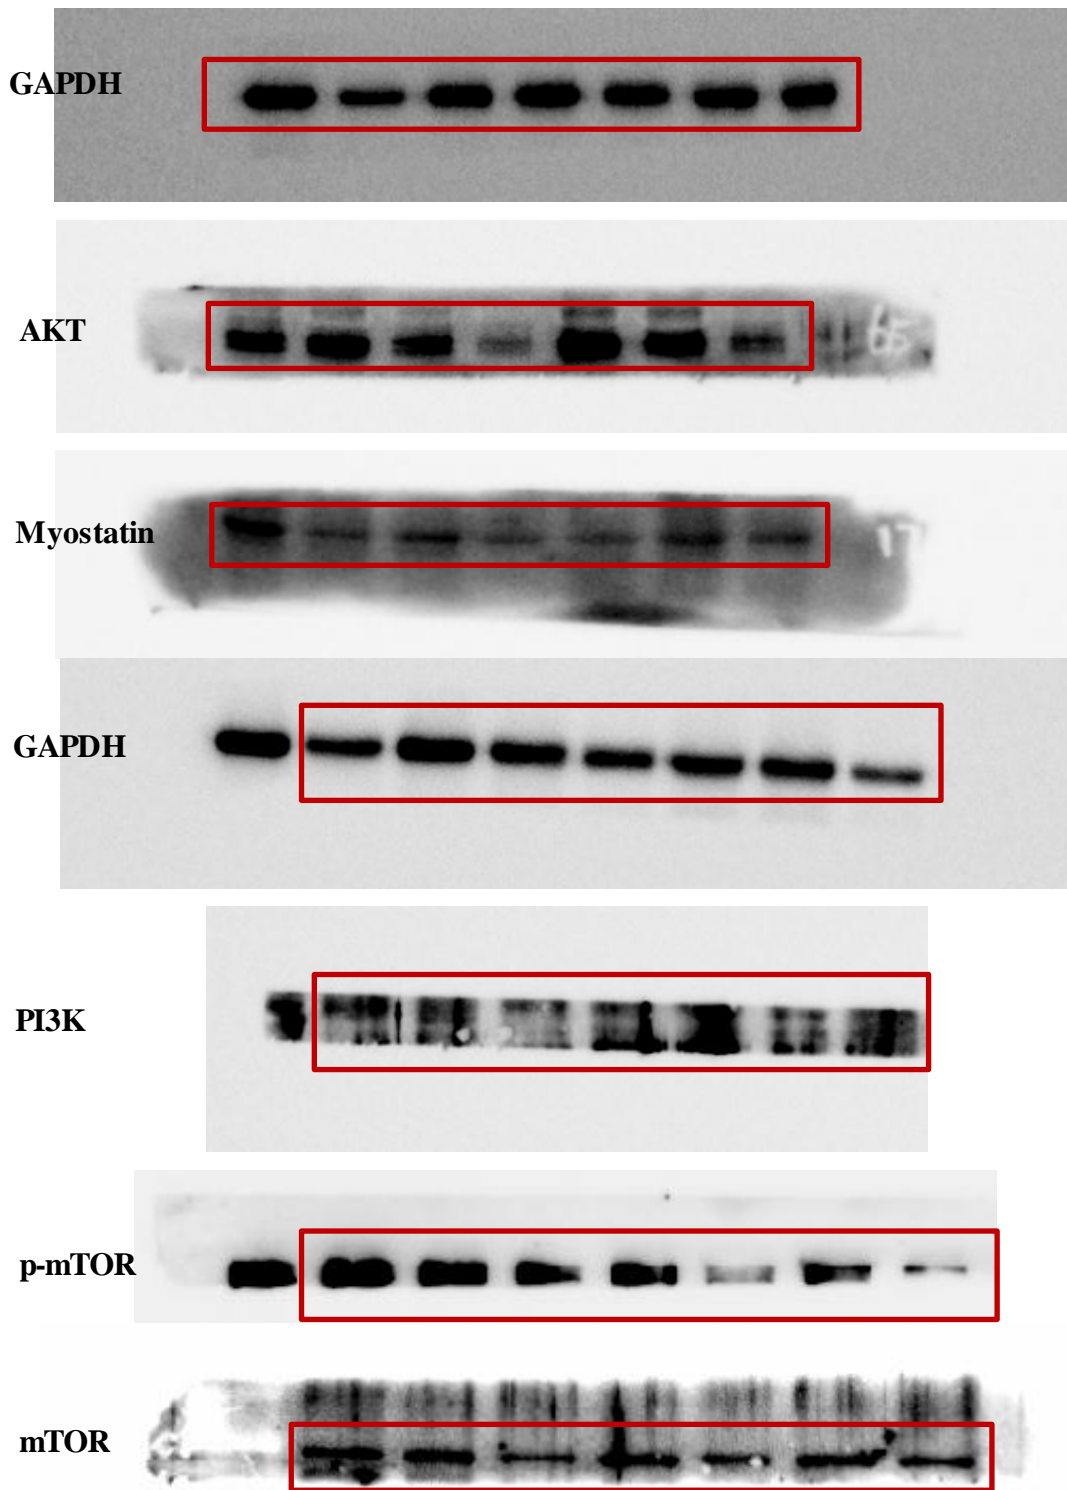

**Figure S5.** Uncropped western blots with indicated areas of selection.

**Table S1. The body weights and coefficients of various tissues to body weight at the end of treatment**

| <b>Group</b>    | <b>Organ coefficients (mg/g)</b> |              |               |             |                |
|-----------------|----------------------------------|--------------|---------------|-------------|----------------|
|                 | <b>Body weight (g)</b>           | <b>Liver</b> | <b>Spleen</b> | <b>Lung</b> | <b>Kidneys</b> |
| <b>Normal</b>   | 274.5 ± 5.97                     | 40.4 ± 3.63  | 2.6 ± 0.33    | 5.2 ± 0.46  | 8.4 ± 0.59     |
| <b>Negative</b> | 286.3 ± 14.63                    | 35.7 ± 1.47* | 2.5 ± 0.19    | 4.9 ± 0.41  | 8.1 ± 0.58     |
| <b>Positive</b> | 275.1 ± 16.35                    | 39.1 ± 1.23  | 2.6 ± 0.23    | 5.3 ± 0.37  | 7.9 ± 0.41     |
| <b>2 P</b>      | 276.9 ± 16.38                    | 36.7 ± 2.75  | 2.8 ± 0.68    | 5.1 ± 0.20  | 8.2 ± 0.34     |
| <b>2 PP</b>     | 282.2 ± 5.87                     | 37.0 ± 2.61  | 2.5 ± 0.39    | 5.1 ± 0.39  | 8.0 ± 0.66     |
| <b>10 P</b>     | 274.0 ± 11.25                    | 36.1 ± 6.14  | 2.6 ± 0.34    | 4.9 ± 0.42  | 8.2 ± 0.61     |
| <b>10 PP</b>    | 271.5 ± 10.55                    | 34.3 ± 1.37* | 2.6 ± 0.70    | 4.8 ± 0.19  | 8.3 ± 0.34     |

\* Represents significant difference compared to the control group, \*  $p < 0.05$ .

**Table S2. The blood coagulation factors**

| <b>Group</b>    | <b>PT (sec)</b> | <b>INR</b> | <b>PTA (%)</b> | <b>PT-R</b> | <b>APTT (sec)</b> | <b>APTT-R</b> | <b>TT (sec)</b> |
|-----------------|-----------------|------------|----------------|-------------|-------------------|---------------|-----------------|
| <b>Normal</b>   | 10.0 ±0.25      | 0.9 ±0.02  | 117.3 ±5.03    | 0.9 ±0.02   | 17.8 ±1.04        | 0.6 ±0.04     | 27.8 ±4.09      |
| <b>Negative</b> | 9.5 ±0.36       | 0.9 ±0.04  | 129.3 ±8.62    | 0.9 ±0.03   | 17.6 ±0.76        | 0.6 ±0.02     | 28.3 ±8.24      |
| <b>Positive</b> | 9.5 ±0.45       | 0.9 ±0.04  | 130.3 ±11.06   | 0.8 ±0.04   | 17.2 ±1.04        | 0.6 ±0.03     | 27.1 ±7.49      |
| <b>2 P</b>      | 9.6 ±0.15       | 0.9 ±0.02  | 130.3 ±4.04    | 0.8 ±0.02   | 17.8 ±1.25        | 0.6 ±0.05     | 25.3 ±3.84      |
| <b>2 PP</b>     | 9.7 ±0.15       | 0.9 ±0.02  | 123.3 ±3.05    | 0.9 ±0.01   | 17.9 ±0.62        | 0.7 ±0.02     | 30.7 ±2.21      |
| <b>10 P</b>     | 9.3 ±0.40       | 0.8 ±0.04  | 133.3 ±10.69   | 0.8 ±0.04   | 19.5 ±1.35        | 0.7 ±0.05     | 25.9 ±1.65      |
| <b>10 PP</b>    | 9.9 ±0.36       | 0.9 ±0.03  | 120.0 ±7.21    | 0.9 ±0.03   | 20.4 ±0.85        | 0.7 ±0.03     | 27.6 ±1.29      |



**Table S3. Complete blood counts**

| <b>Group</b>    | <b>WBC (<math>10^9/L</math>)</b> | <b>RBC (<math>10^{12}/L</math>)</b> | <b>HGB (g/L)</b>  | <b>NEUT (%)</b> | <b>LY (%)</b>   | <b>MONO (%)</b> |
|-----------------|----------------------------------|-------------------------------------|-------------------|-----------------|-----------------|-----------------|
| <b>Normal</b>   | 7.5 $\pm$ 3.63                   | 6.4 $\pm$ 0.33                      | 136.7 $\pm$ 3.21  | 11.7 $\pm$ 2.27 | 86.4 $\pm$ 2.31 | 2.2 $\pm$ 0.32  |
| <b>Negative</b> | 2.6 $\pm$ 0.29                   | 7.0 $\pm$ 1.20                      | 133.3 $\pm$ 2.55  | 11.6 $\pm$ 3.40 | 84.8 $\pm$ 3.69 | 2.0 $\pm$ 1.03  |
| <b>Positive</b> | 5.4 $\pm$ 2.89                   | 7.0 $\pm$ 0.37                      | 139.7 $\pm$ 13.50 | 17.1 $\pm$ 5.82 | 79.9 $\pm$ 5.88 | 2.2 $\pm$ 0.76  |
| <b>2 P</b>      | 4.3 $\pm$ 2.55                   | 6.7 $\pm$ 0.34                      | 126.0 $\pm$ 7.21  | 17.4 $\pm$ 5.16 | 79.6 $\pm$ 5.95 | 1.7 $\pm$ 0.85  |
| <b>2 PP</b>     | 4.6 $\pm$ 0.76                   | 7.7 $\pm$ 1.41                      | 134.7 $\pm$ 6.11  | 17.4 $\pm$ 4.96 | 80.2 $\pm$ 5.65 | 1.6 $\pm$ 1.40  |
| <b>10 P</b>     | 3.7 $\pm$ 1.24                   | 7.0 $\pm$ 0.33                      | 130.0 $\pm$ 5.57  | 16.9 $\pm$ 5.88 | 81.2 $\pm$ 2.23 | 1.7 $\pm$ 1.22  |
| <b>10 PP</b>    | 2.1 $\pm$ 0.63                   | 6.9 $\pm$ 0.73                      | 129.7 $\pm$ 14.57 | 14.9 $\pm$ 4.24 | 82.7 $\pm$ 5.43 | 1.8 $\pm$ 0.25  |

**Table S4. Complete blood counts (Continued)**

| <b>Group</b>    | <b>Hct (L/L)</b> | <b>MCV (fL)</b> | <b>MCH (pg)</b> | <b>MCHC (g/L)</b> | <b>RDW (%)</b> | <b>PLT (10<sup>9</sup>/L)</b> | <b>PCT (%)</b> | <b>MPV (fL)</b> | <b>PDW (fL)</b> |
|-----------------|------------------|-----------------|-----------------|-------------------|----------------|-------------------------------|----------------|-----------------|-----------------|
| <b>Normal</b>   | 0.4 ±0.01        | 66.7 ±3.00      | 21.5 ±0.65      | 323.0 ±5.57       | 13.9 ±0.15     | 651.3 ±34.99                  | 0.5 ±0.03      | 7.8 ±0.06       | 7.4 ±0.36       |
| <b>Negative</b> | 0.4 ±0.06        | 56.8 ±1.39*     | 19.1 ±0.50**    | 336.7 ±4.16*      | 12.4 ±0.42*    | 807.3 ±16.17**                | 0.6 ±0.01*     | 7.7 ±0.12       | 7.7 ±0.25       |
| <b>Positive</b> | 0.4 ±0.04        | 57.2 ±2.37*     | 19.8 ±0.90      | 326.3 ±4.08       | 12.3 ±0.31*    | 658.3 ±24.25                  | 0.6 ±0.14      | 7.9 ±0.20       | 7.9 ±0.35       |
| <b>2 P</b>      | 0.4 ±0.03        | 60.4 ±2.57      | 20.9 ±0.62      | 321.3 ±3.05       | 13.6 ±0.71     | 692.7 ±32.75                  | 0.6 ±0.03      | 7.9 ±0.25       | 7.7 ±0.36       |
| <b>2 PP</b>     | 0.4 ±0.01        | 52.9 ±8.05      | 17.7 ±2.40      | 336.0 ±9.54       | 14.4 ±2.70     | 663.3 ±32.10                  | 0.5 ±0.03      | 7.3 ±0.28       | 7.1 ±0.23       |
| <b>10 P</b>     | 0.4 ±0.02        | 63.0 ±0.26      | 20.6 ±0.20      | 314.7 ±3.79       | 14.0 ±0.36     | 719.3 ±54.88                  | 0.5 ±0.08      | 7.7 ±0.10       | 7.5 ±0.17       |
| <b>10 PP</b>    | 0.4 ±0.03        | 59.7 ±5.37      | 21.7 ±0.15      | 319.3 ±10.12      | 13.8 ±0.53     | 650.0 ±38.28                  | 0.4 ±0.26      | 7.7 ±0.06       | 7.5 ±0.40       |

\* and \*\* represent significant difference compared to the normal control group, \* $p < 0.05$  and \*\* $p < 0.01$ , respectively.

**Table S5. Blood biochemical analyses**

| <b>Group</b>    | <b>BUN (mmol/L)</b> | <b>CR (mmol/L)</b> | <b>ALT (U/L)</b> | <b>AST (U/L)</b> | <b>LDH (U/L)</b> | <b>CK (U/L)</b> | <b>TP (g/L)</b> | <b>ALB (g/L)</b> |
|-----------------|---------------------|--------------------|------------------|------------------|------------------|-----------------|-----------------|------------------|
| <b>Normal</b>   | 11.8 ±0.42          | 12.3 ±0.58         | 49.3 ±5.70       | 134.0 ±5.71      | 588.3 ±24.11     | 602.7 ±52.26    | 55.9 ±2.08      | 33.6 ±0.87       |
| <b>Negative</b> | 14.4 ±0.85**        | 11.3 ±3.21         | 46.3 ±4.04       | 175.3 ±10.69*    | 1947.7 ±59.21**  | 641.3 ±70.51    | 56.1 ±2.73      | 32.1 ±0.35       |
| <b>Positive</b> | 10.4 ±1.97          | 11.0 ±1.73         | 48.0 ±7.00       | 144.7 ±16.56     | 618.7 ±39.83     | 615.0 ±52.07    | 56.3 ±0.74      | 33.2 ±1.69       |
| <b>2 P</b>      | 11.4 ±1.59          | 10.0 ±3.61         | 54.0 ±7.00       | 139.7 ±13.87     | 613.0 ±23.14     | 629.7 ±33.89    | 55.7 ±2.88      | 33.5 ±0.61       |
| <b>2 PP</b>     | 12.1 ±1.55          | 11.7 ±1.00         | 48.7 ±3.69       | 138.8 ±13.35     | 603.3 ±49.29     | 607.0 ±42.28    | 54.2 ±1.27      | 33.3 ±0.31       |
| <b>10 P</b>     | 11.7 ±1.19          | 9.3 ±2.31          | 51.2 ±1.53       | 140.3 ±7.02      | 622.7 ±45.51     | 611.7 ±24.18    | 53.6 ±2.08      | 33.5 ±1.13       |
| <b>10 PP</b>    | 10.9 ±0.55          | 9.67 ±1.53         | 62.0 ±9.00       | 138.7 ±12.37     | 614.3 ±30.22     | 597.7 ±25.46    | 53.1 ±2.29      | 33.6 ±1.25       |

\* and \*\* represent significant difference compared to the normal control group, \* $p < 0.05$  and \*\* $p < 0.01$ , respectively.
